# Supplementary material
Source: PubMed Central journal article supplement (PMC4976252)
Supplement: Supp_Fig1.pdf [file Supp_Fig1.pdf]

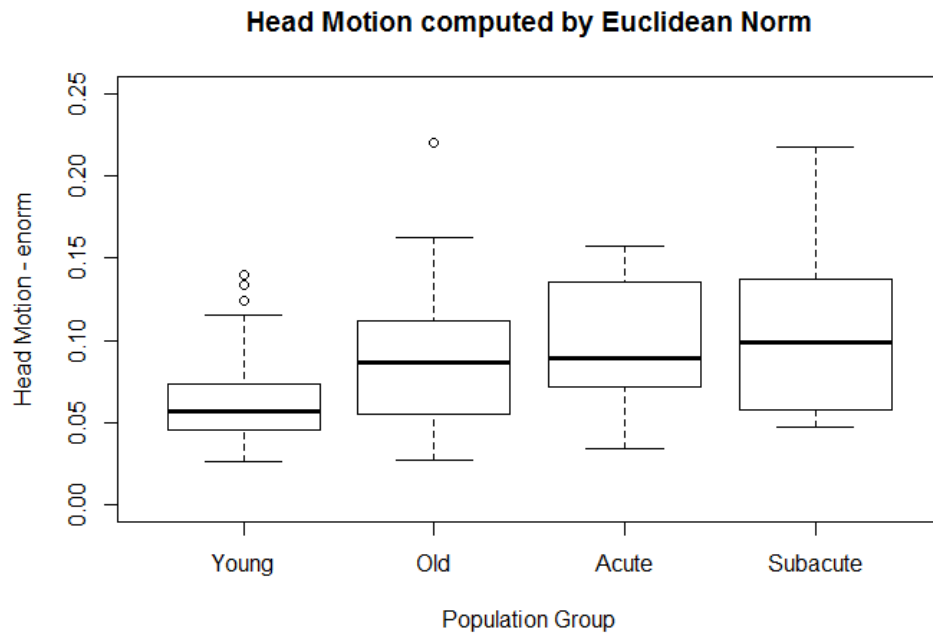

**Supplemental Material A. Euclidean Norms for Population group motion estimates. Motion estimate by Euclidean norm per population groups with age demonstrated as a factor for head motion (i.e. older subjects with higher head motion) (Young vs. Old:  $t=3.145$ ,  $p=0.002$ ), but with head motion in the acute and subacute stroke groups not differing from motion observed in the healthy older group (Old vs. Acute:  $t=1.371$ ,  $p=0.184$ ; Old vs. Subacute:  $t=1.714$ ,  $p=0.100$ )**
