# Supplementary material
Source: PubMed Central journal article supplement (PMC4976252)
Supplement: Supp_Fig2.pdf [file Supp_Fig2.pdf]

**ALFF:**  
**Slow-5 (0.01-0.027-Hz) vs. Slow-4 (0.027-0.073-Hz)**

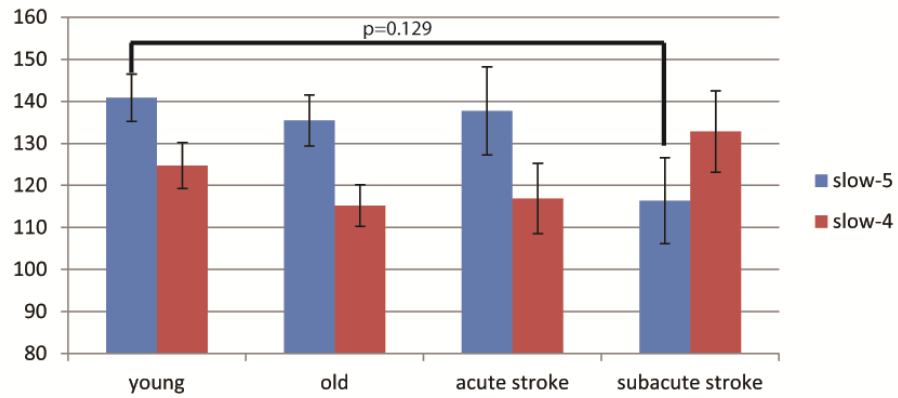

**Supplemental Material C. ALFF of slow-5 & slow-4 showing similar pattern of reduction of slow-5 oscillation power as observed in figure 6 (slow-5 & slow-4 fALFF). The similar pattern from ALFF and fALFF suggests that the observed effect of reduced fALFF in the subacute population is likely due to change in spectral amplitude within those frequencies (i.e. decrease in slow-5 and increase in slow-4), with limited effect from changes outside of those fluctuation ranges.**
