# Supplementary material
Source: PubMed Central journal article supplement (PMC4976252)
Supplement: Supp_Table1.pdf [file Supp_Table1.pdf]

| Subject | Age<br>(years) | Gender | Lesion    | Hemisphere | Categorization | Time after stroke onset<br>(weeks) | NIH-SS<br>(0-42) |
|---------|----------------|--------|-----------|------------|----------------|------------------------------------|------------------|
| 1       | 74             | M      | Occ       | Bi         | Acute          | 7                                  | 1                |
| 2       | 84             | M      | PeriOl    | L          | Acute          | 5                                  | n/a              |
| 3       | 59             | M      | Front     | R          | Acute          | 4                                  | 2                |
| 4       | 79             | M      | Front     | L          | Acute          | 6                                  | 2                |
| 5*      | 70             | M      | Temp-Par  | L          | Acute          | 2                                  | 2                |
| 6*      | 47             | F      | Front-Par | L          | Acute          | 9                                  | 0                |
| 7       | 55             | M      | Par       | L          | Acute          | 3                                  | 0                |
| 8       | 81             | F      | Temp-Par  | L          | Acute          | 4                                  | 2                |
| 9       | 73             | M      | Ins       | R          | Acute          | 4                                  | 0                |
| 10      | 77             | F      | Cereb     | R          | Acute          | 1                                  | n/a              |
| 11      | 57             | M      | Temp-Occ  | L          | Acute          | 5                                  | 0                |
| 12      | 45             | M      | Cereb     | L          | Acute          | 3                                  | 2                |
| 13      | 81             | M      | Thal      | R          | Acute          | 6                                  | 2                |
| 14      | 62             | M      | Ins       | L          | Acute          | 2                                  | 2                |
| 15      | 33             | F      | Cereb     | R          | Acute          | 7                                  | 15               |
| 16      | 50             | M      | Pons      | R          | Acute          | 7                                  | 13               |
| 17      | 76             | F      | Put       | R          | SubAcute       | 136                                | 10               |
| 18      | 64             | F      | Occ       | Bi         | SubAcute       | 38                                 | 3                |
| 19      | 67             | F      | PeriOl    | R          | SubAcute       | 164                                | 4                |
| 20      | 63             | M      | PeriOl    | R          | SubAcute       | 69                                 | 0                |
| 21      | 59             | F      | Caudate   | R          | SubAcute       | 124                                | 2                |
| 22      | 57             | F      | PeriOl    | L          | SubAcute       | 175                                | 1                |
| 23      | 62             | M      | Par       | L          | SubAcute       | 126                                | 0                |
| 24      | 75             | M      | Occ       | L          | SubAcute       | 146                                | 1                |
| 25      | 41             | F      | Ins       | L          | SubAcute       | 31                                 | n/a              |
| 26      | 65             | M      | Thal      | R          | SubAcute       | 165                                | 0                |
| 27      | 49             | M      | Temp-Par  | R          | SubAcute       | 122                                | 6                |
| 28      | 71             | M      | IntCap    | R          | SubAcute       | 24                                 | 2                |
| 29      | 69             | M      | Cereb     | L          | SubAcute       | 74                                 | 0                |
| 30      | 52             | F      | Cereb     | L          | SubAcute       | 180                                | 1                |

|    |    |   |          |   |          |     |    |
|----|----|---|----------|---|----------|-----|----|
| 31 | 42 | M | Temp-Par | R | SubAcute | 12  | 13 |
| 32 | 45 | M | Medulla  | L | SubAcute | 13  | 1  |
| 33 | 45 | F | Cereb    | R | SubAcute | 31  | 0  |
| 34 | 53 | M | Cereb    | R | SubAcute | 155 | 0  |

**Supplemental Material A. Clinical and Demographic Information for the 34 Ischemic Stroke patients enrolled (acute and subacute). Note: Occ, Occipital; PeriOl, PeriOlandic; Front, Frontal, Temp-Par, Temporo-Parietal; Front-Par, Front-Parietal; Par, Parietal; Ins, Insula, Cereb, Cerebellum; Temp-Occ, Temporal-Occipital; Ins, Insula; Put, Putamen; Caud, Caudate; IntCap, Internal Capsule. \* denotes patients with DMN lesion who were excluded from the study analysis.**
